# Supplementary material for: SLL-1A-16 suppresses proliferation and induces autophagy in non-small-cell lung cancer cells via the AKT/mTOR signaling pathway
Source: Royal Society of Chemistry journal article supplement (doi:10.1039/d4md00405a), 2024-01-01
Supplement: d4md00405a1.pdf [file d4md00405a1.pdf]

## SUPPORTING INFORMATION

### 1. Characterization of the SLL-1A-16 using HPLC, Mass spectrometry and MRI.

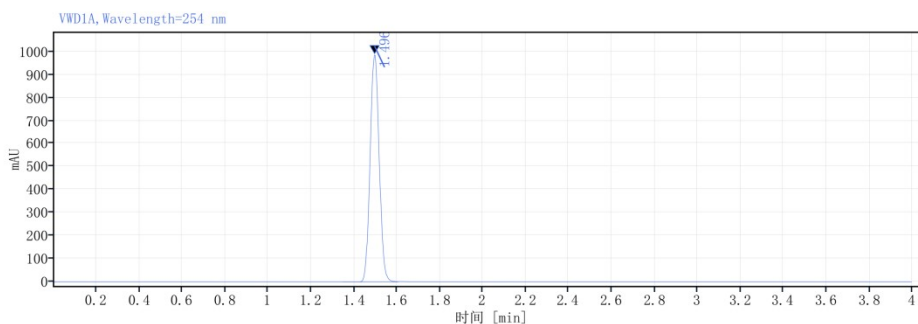

Figure S1. HPLC chromatogram of synthesized SLL-1A-16.

2.

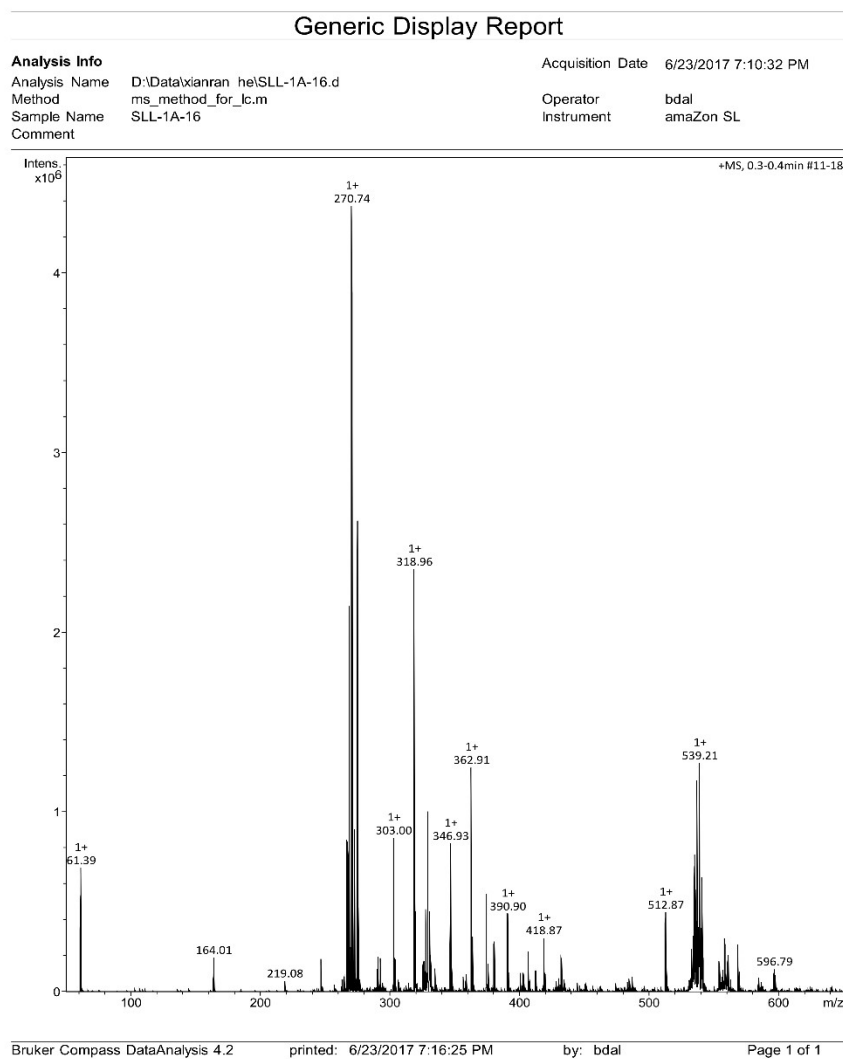

Figure S2. Mass spectrometry analysis of SLL-1A-16.

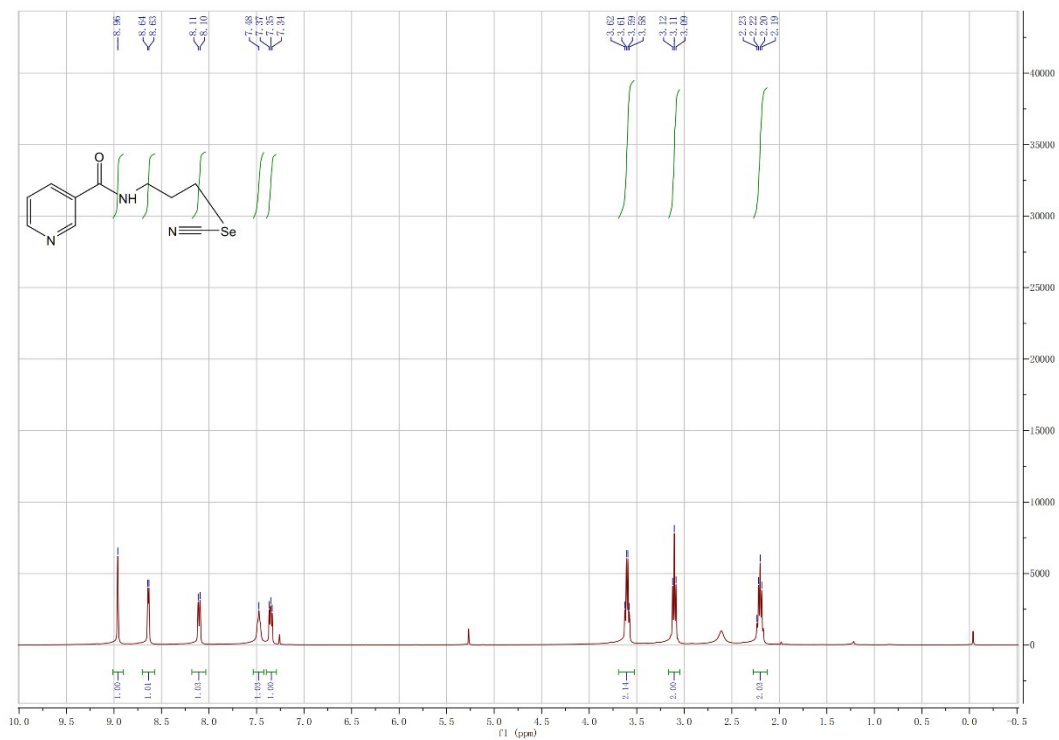

Figure S3. <sup>1</sup>H MRI analysis of SLL-1A-16.

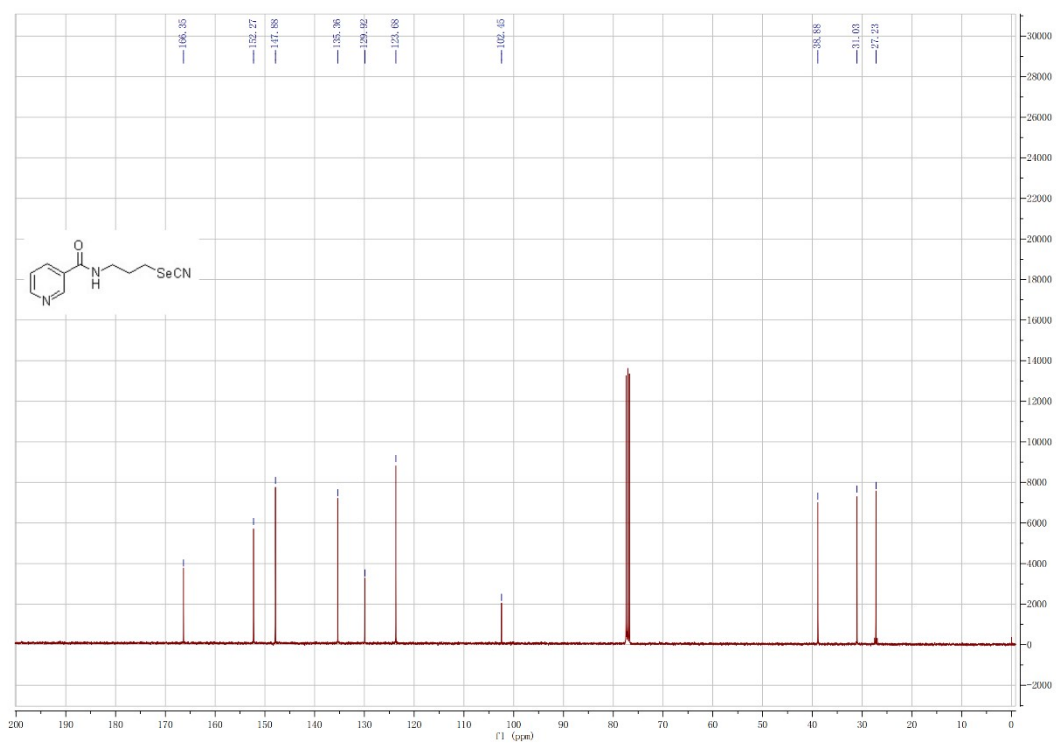

Figure S4. <sup>13</sup>C MRI analysis of SLL-1A-16.

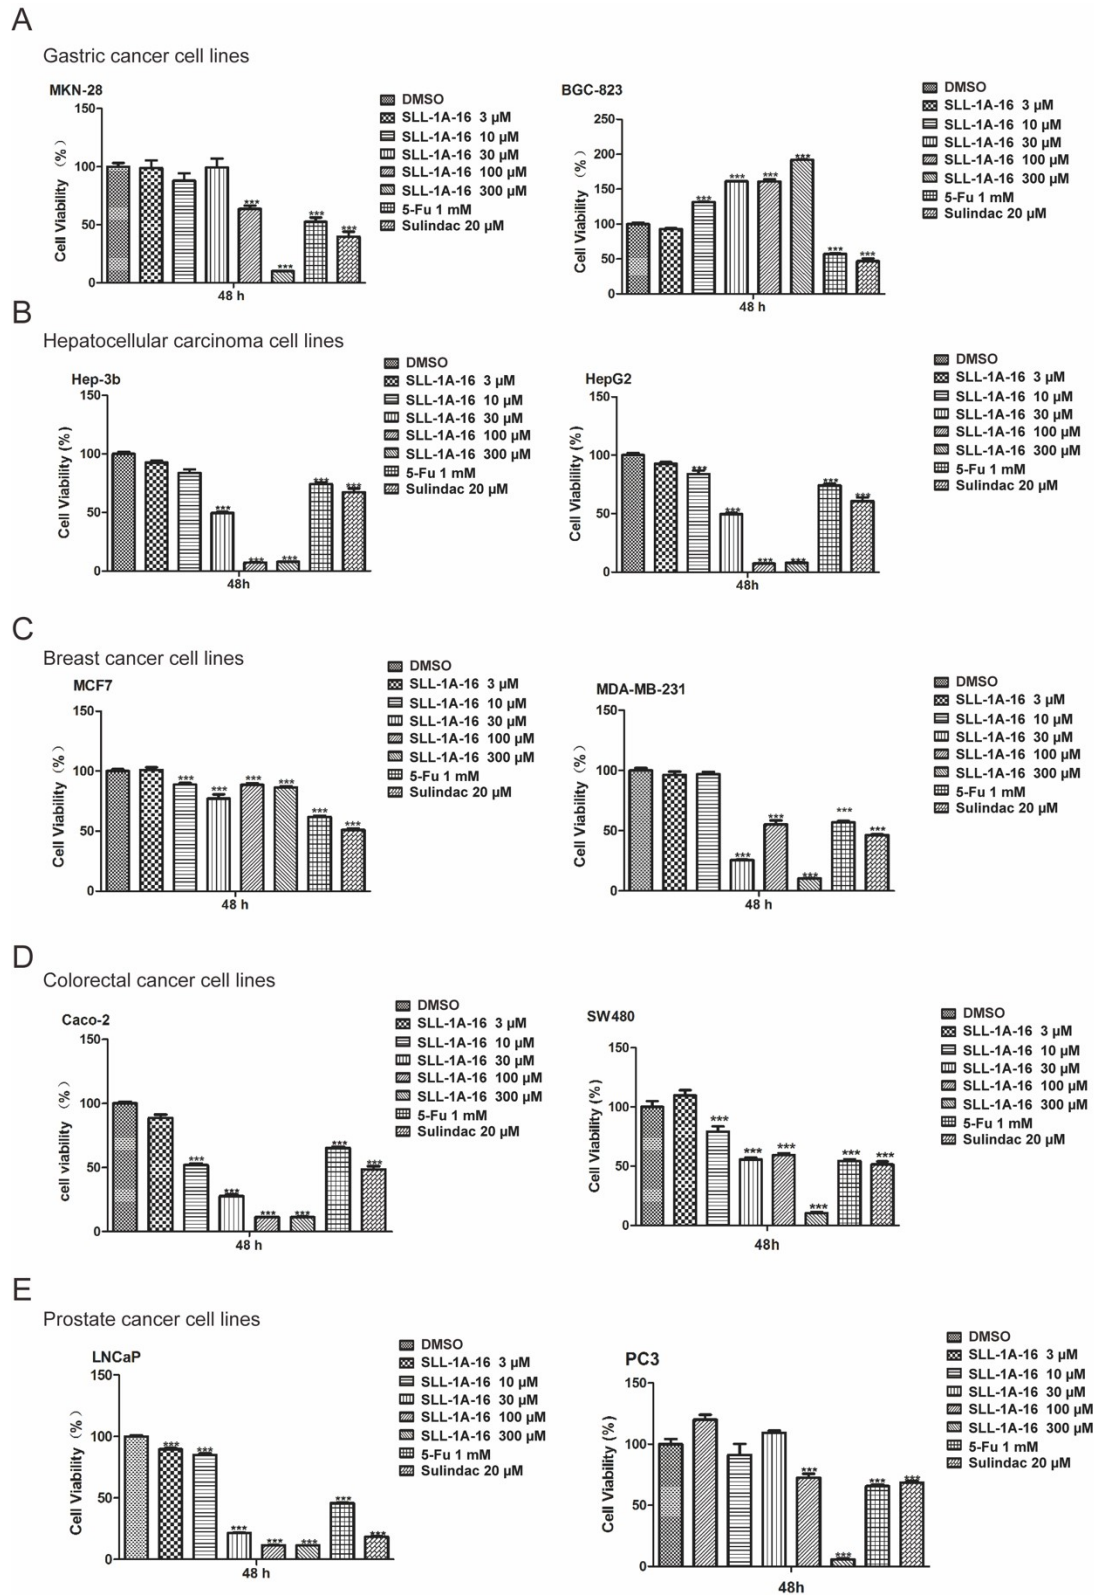

Figure S5. SLL-1A-16 inhibits proliferation of various cells. (A) The effects of SLL-1A-16 on cell viability in MKN-28 and BGC-823 cells were evaluated by CCK8 assay after treatment with increasing doses of the compound for 48 h, n=4. (B) The effects of SLL-1A-16 on cell viability in Hep-3b and HepG2 cells. (C) The effects of SLL-1A-16 on cell viability in MCF 7 and MDA-MB-221 cells. (D) The effects of SLL-1A-16 on cell viability in Caco-2 and SW480 cells. (E) The effects

of SLL-1A-16 on cell viability in LNCaP and PC3 cells. The data are presented as mean  $\pm$  SD (n=4). \*\*p < 0.01, \*\*\*p < 0.001 compared to the control group.

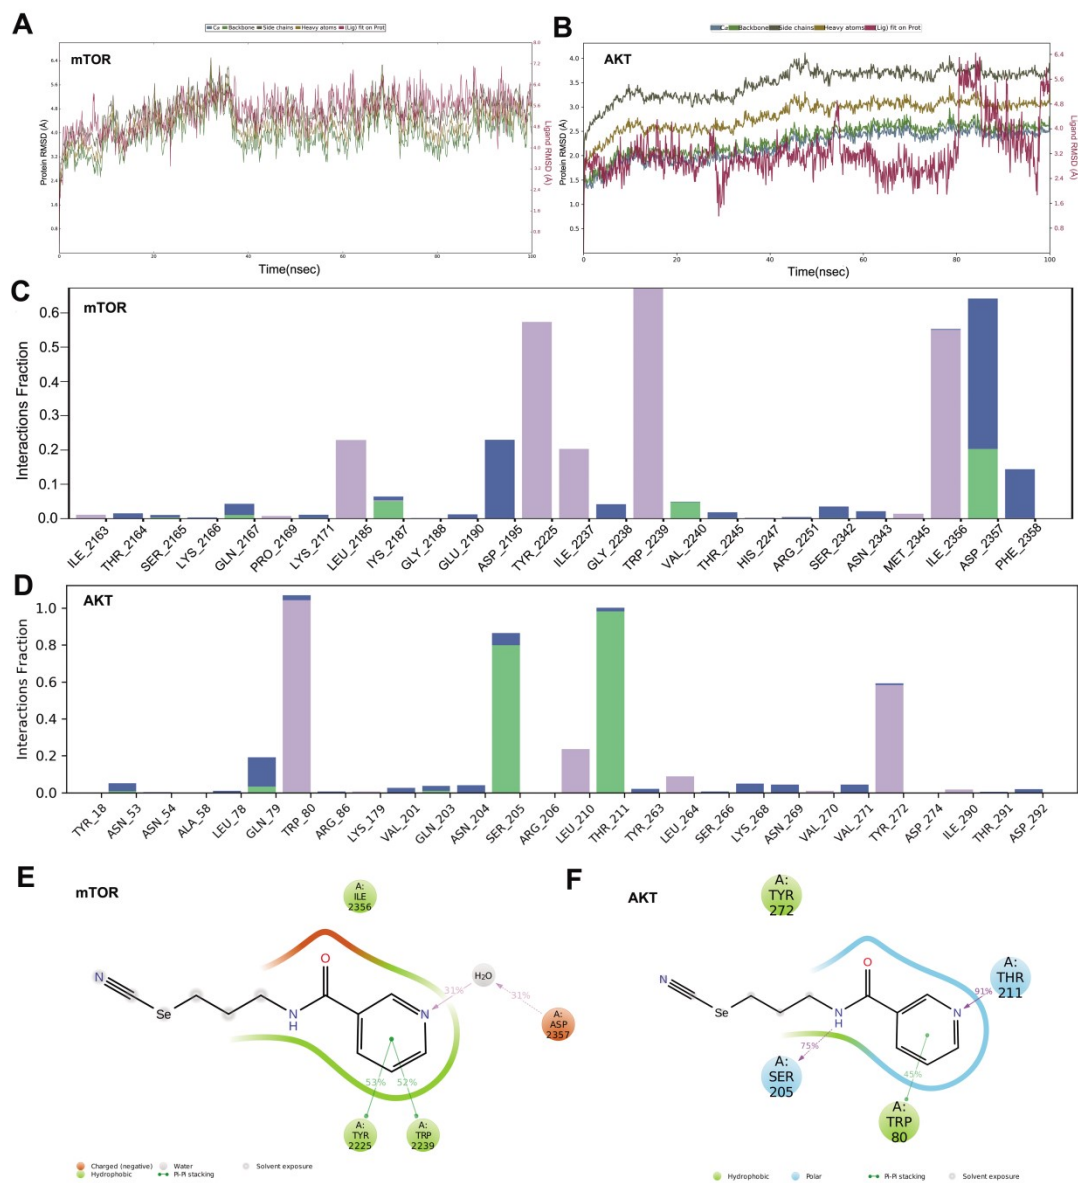

Figure S6. Molecular dynamic simulation analysis of S-400 with AKT and mTOR. (A-B) Molecular dynamics RMSD analysis of mTOR-S-400 (left) and AKT-S-400 (right) docking models over a period of 100 ns. (C-D) The protein–ligand interaction diagram of mTOR-S-400 and AKT-S-400 in MD simulations. (E) Schematic diagram of ligand interaction with the amino acid residues of protein mTOR or AKT during MD simulation.
